# Supplementary material
Source: Research Square preprint supplement (doi:10.21203/rs.3.rs-9324654/v1)
Supplement: Supplementary file 1 [file 22648d7cd930460ba70f37a6.pdf]

**A Robust Magnetically Recoverable Nickel Nanocatalyst for Sustainable  $\alpha$ -Olefination of Nitriles Using Primary Alcohols**

Effat Vatankhah, Hossein Eshghi,\* Ali Shiri

*Department of Chemistry, Faculty of Science, Ferdowsi University of Mashhad, Mashhad, Iran.*

*Corresponding author: E-mail: heshghi@um.ac.ir*

## **Table of Contents**

|                                |           |
|--------------------------------|-----------|
| 1.Structure analysis (3a)..... | <b>3</b>  |
| 2.Structure analysis (3b)..... | <b>5</b>  |
| 3.Structure analysis (3c)..... | <b>7</b>  |
| 4.Structure analysis (3d)..... | <b>9</b>  |
| 5.Structure analysis (3e)..... | <b>11</b> |
| 6.Structure analysis (3f)..... | <b>13</b> |
| 7.Structure analysis (3j)..... | <b>15</b> |

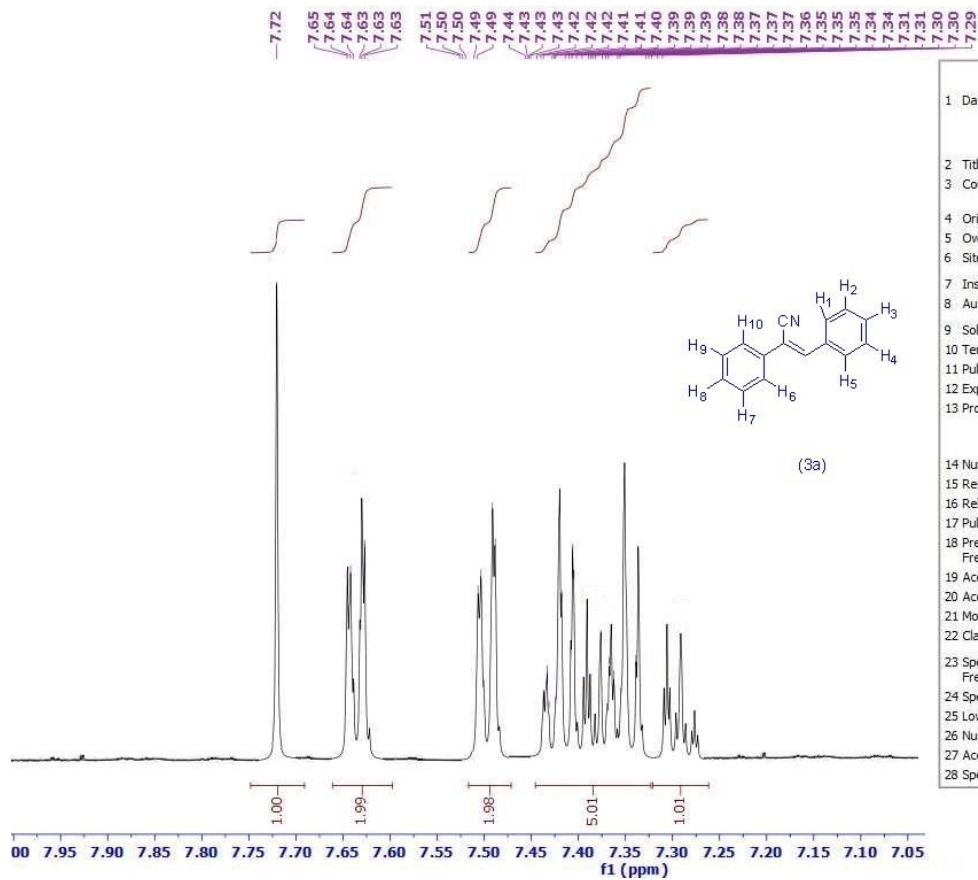

| Parameter                  | Value                                                                     |
|----------------------------|---------------------------------------------------------------------------|
| 1 Data File Name           | C:/Users/vatankhah/AppData/Local/Temp/\$kpx3NIVQ9G6Hjtkk4p+Q/Mehr/312/fid |
| 2 Title                    | Mehr_312.fid                                                              |
| 3 Comment                  | Dr.Shiri- code CN-OH2(vatankhah)-                                         |
| 4 Origin                   | Bruker BioSpin GmbH                                                       |
| 5 Owner                    | root                                                                      |
| 6 Site                     |                                                                           |
| 7 Instrument               | spect                                                                     |
| 8 Author                   |                                                                           |
| 9 Solvent                  | CDCl3                                                                     |
| 10 Temperature             | 296.7                                                                     |
| 11 Pulse Sequence          | zg30                                                                      |
| 12 Experiment              | 1D                                                                        |
| 13 Probe                   | 5 mm PABBO BB-1H/ D Z-GRD Z104275/ 0252                                   |
| 14 Number of Scans         | 48                                                                        |
| 15 Receiver Gain           | 202.0                                                                     |
| 16 Relaxation Delay        | 1.0000                                                                    |
| 17 Pulse Width             | 15.0000                                                                   |
| 18 Presaturation Frequency |                                                                           |
| 19 Acquisition Time        | 5.4526                                                                    |
| 20 Acquisition Date        | 2021-10-09T14:05:00                                                       |
| 21 Modification Date       | 2024-02-26T05:01:49                                                       |
| 22 Class                   |                                                                           |
| 23 Spectrometer Frequency  | 300.81                                                                    |
| 24 Spectral Width          | 6009.6                                                                    |
| 25 Lowest Frequency        | -1179.7                                                                   |
| 26 Nucleus                 | 1H                                                                        |
| 27 Acquired Size           | 32768                                                                     |
| 28 Spectral Size           | 65536                                                                     |

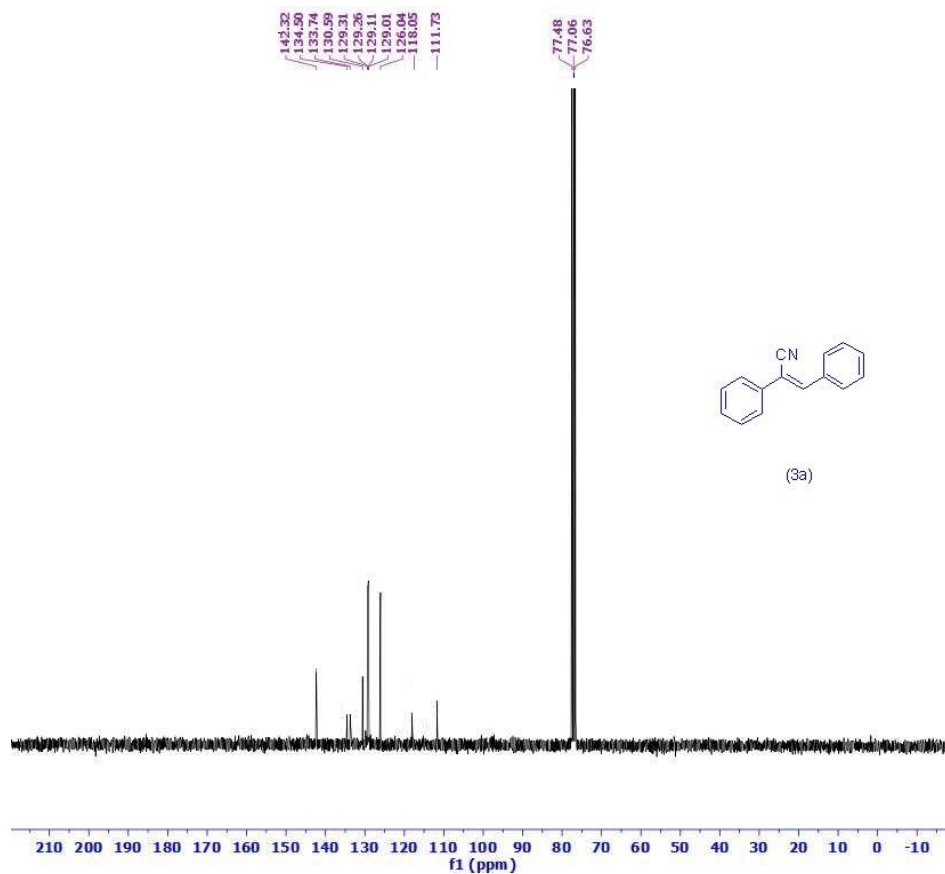

| Parameter                  | Value                                                                       |
|----------------------------|-----------------------------------------------------------------------------|
| 1 Data File Name           | C:/Users/saeid.pc/AppData/Local/Temp/HaeTFxW/SQjeT3eDk47oWlg/Mordad/938/fid |
| 2 Title                    | Mordad.938.fid                                                              |
| 3 Comment                  | Dr.Shiri- code pr-Mo(vatankhah)-                                            |
| 4 Origin                   | Bruker BioSpin GmbH                                                         |
| 5 Owner                    | root                                                                        |
| 6 Site                     |                                                                             |
| 7 Instrument               | spect                                                                       |
| 8 Author                   |                                                                             |
| 9 Solvent                  | CDCl3                                                                       |
| 10 Temperature             | 300.5                                                                       |
| 11 Pulse Sequence          | zgpg30                                                                      |
| 12 Experiment              | 1D                                                                          |
| 13 Probe                   | 5 mm PABBO BB-1H/ D Z-GRD Z104275/ 0252                                     |
| 14 Number of Scans         | 250                                                                         |
| 15 Receiver Gain           | 202.0                                                                       |
| 16 Relaxation Delay        | 2.0000                                                                      |
| 17 Pulse Width             | 10.0000                                                                     |
| 18 Presaturation Frequency |                                                                             |
| 19 Acquisition Time        | 1.8088                                                                      |
| 20 Acquisition Date        | 2024-08-15T19:47:00                                                         |
| 21 Modification Date       | 2024-10-06T12:56:22                                                         |
| 22 Class                   |                                                                             |
| 23 Spectrometer Frequency  | 75.65                                                                       |
| 24 Spectral Width          | 18115.9                                                                     |
| 25 Lowest Frequency        | -1494.8                                                                     |
| 26 Nucleus                 | 13C                                                                         |
| 27 Acquired Size           | 32768                                                                       |
| 28 Spectral Size           | 65536                                                                       |

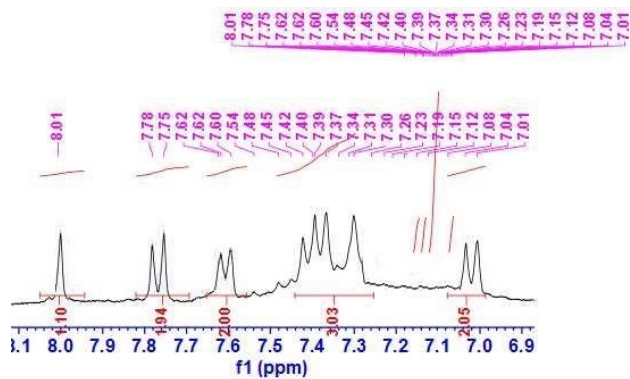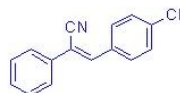

(3b)

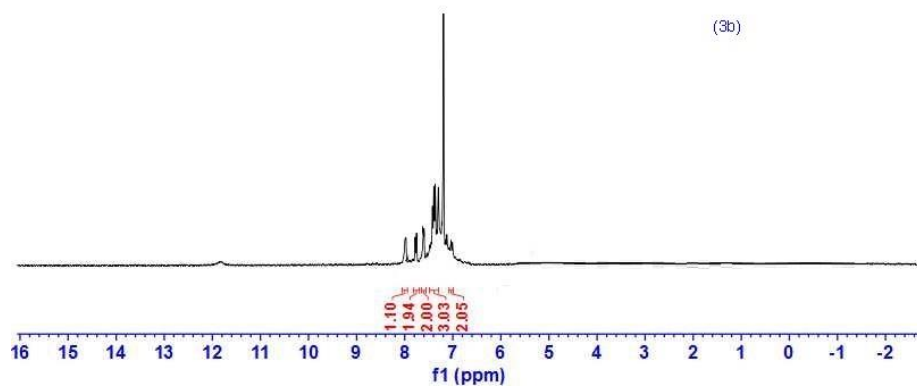

| Parameter                  | Value                                                                  |
|----------------------------|------------------------------------------------------------------------|
| 1 Data File Name           | C:/Users/saeid.pc/AppData/Local/Temp/goS3SKzRukTWPlChVG8g/Mehr/180/fid |
| 2 Title                    | Mehr.180.fid                                                           |
| 3 Comment                  | Dr.Eshghi- code 1- CN250(vatankhah)-                                   |
| 4 Origin                   | Bruker BioSpin GmbH                                                    |
| 5 Owner                    | root                                                                   |
| 6 Site                     |                                                                        |
| 7 Instrument               | spect                                                                  |
| 8 Author                   |                                                                        |
| 9 Solvent                  | CDCl3                                                                  |
| 10 Temperature             | 293.2                                                                  |
| 11 Pulse Sequence          | zg30                                                                   |
| 12 Experiment              | 1D                                                                     |
| 13 Probe                   | 5 mm PABBO BB-1H/ D Z-GRD Z104275/0252                                 |
| 14 Number of Scans         | 88                                                                     |
| 15 Receiver Gain           | 202.0                                                                  |
| 16 Relaxation Delay        | 1.0000                                                                 |
| 17 Pulse Width             | 15.0000                                                                |
| 18 Presaturation Frequency |                                                                        |
| 19 Acquisition Time        | 5.4526                                                                 |
| 20 Acquisition Date        | 2021-10-03T11:20:00                                                    |
| 21 Modification Date       | 2025-10-11T13:59:44                                                    |
| 22 Class                   |                                                                        |
| 23 Spectrometer Frequency  | 300.81                                                                 |
| 24 Spectral Width          | 6009.6                                                                 |
| 25 Lowest Frequency        | -1178.8                                                                |
| 26 Nucleus                 | 1H                                                                     |
| 27 Acquired Size           | 32768                                                                  |
| 28 Spectral Size           | 65536                                                                  |

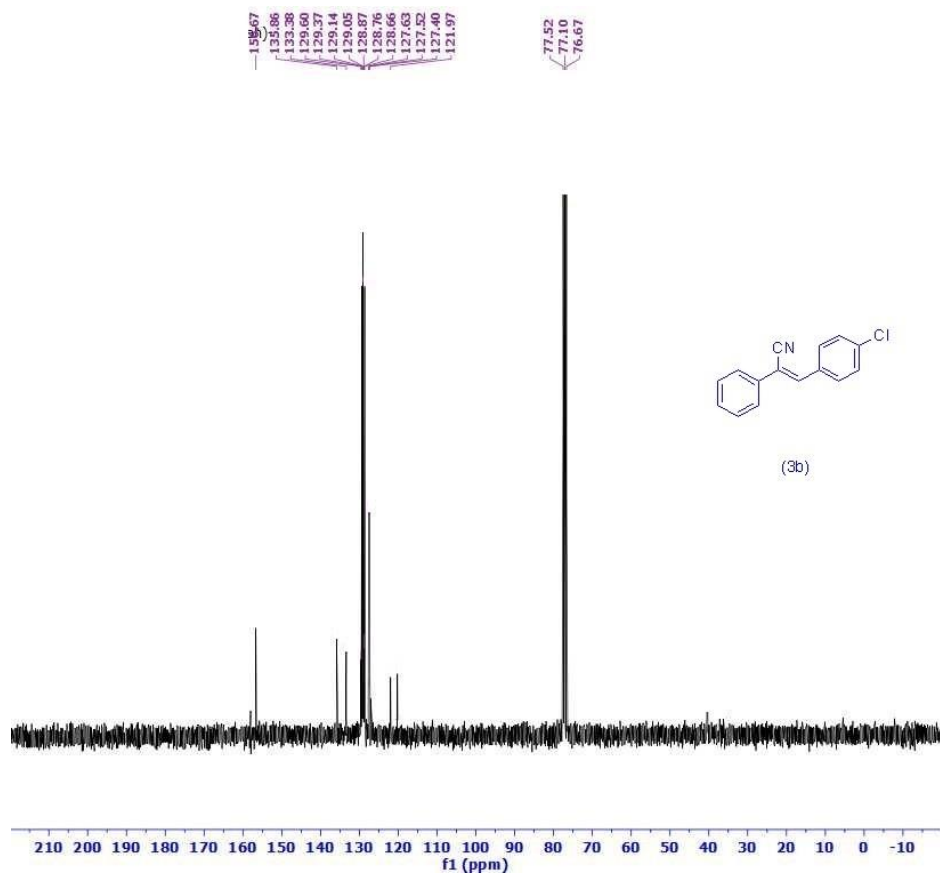

| Parameter                  | Value                                                                       |
|----------------------------|-----------------------------------------------------------------------------|
| 1 Data File Name           | C:/Users/saeid.pc/AppData/Local/Temp/HaeTFxW/SQjeT3eDk47oWlg/Mordad/938/fid |
| 2 Title                    | Mordad.938.fid                                                              |
| 3 Comment                  | Dr.Shiri- code pr-Mo(vatankhah)-                                            |
| 4 Origin                   | Bruker BioSpin GmbH                                                         |
| 5 Owner                    | root                                                                        |
| 6 Site                     |                                                                             |
| 7 Instrument               | spect                                                                       |
| 8 Author                   |                                                                             |
| 9 Solvent                  | CDCl3                                                                       |
| 10 Temperature             | 300.5                                                                       |
| 11 Pulse Sequence          | zgpg30                                                                      |
| 12 Experiment              | 1D                                                                          |
| 13 Probe                   | 5 mm PABBO BB-1H/ D Z-GRD Z104275/ 0252                                     |
| 14 Number of Scans         | 250                                                                         |
| 15 Receiver Gain           | 202.0                                                                       |
| 16 Relaxation Delay        | 2.0000                                                                      |
| 17 Pulse Width             | 10.0000                                                                     |
| 18 Presaturation Frequency |                                                                             |
| 19 Acquisition Time        | 1.8088                                                                      |
| 20 Acquisition Date        | 2024-08-15T19:47:00                                                         |
| 21 Modification Date       | 2024-10-06T12:56:22                                                         |
| 22 Class                   |                                                                             |
| 23 Spectrometer Frequency  | 75.65                                                                       |
| 24 Spectral Width          | 18115.9                                                                     |
| 25 Lowest Frequency        | -1494.8                                                                     |
| 26 Nucleus                 | 13C                                                                         |
| 27 Acquired Size           | 32768                                                                       |
| 28 Spectral Size           | 65536                                                                       |

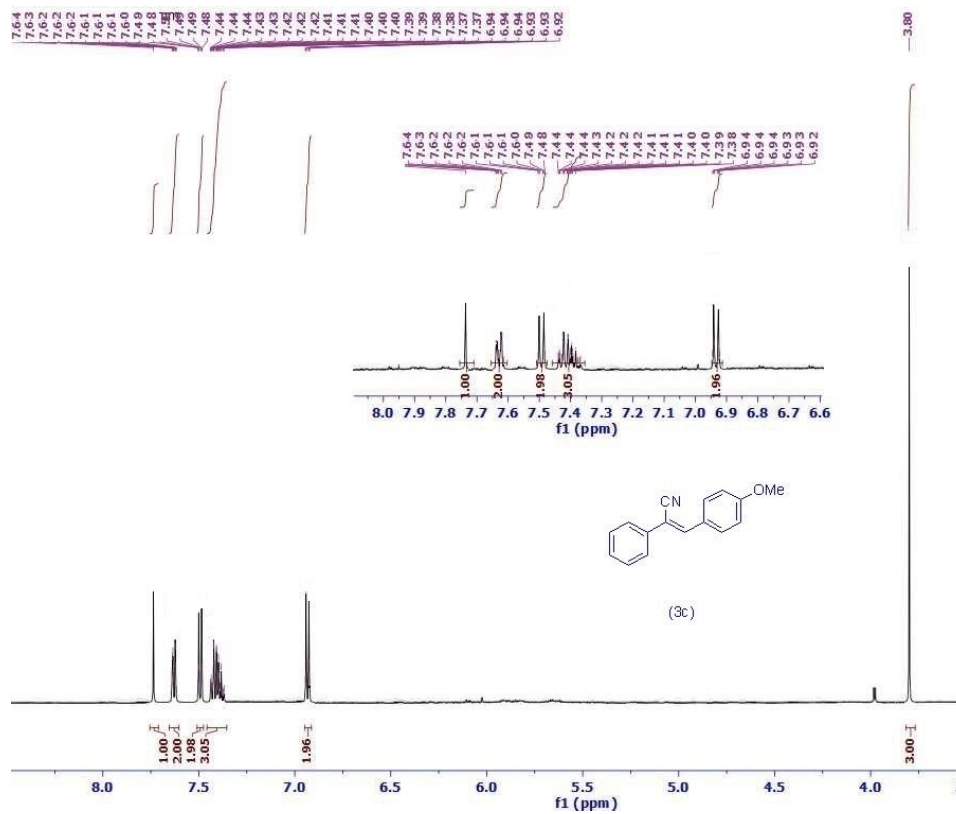

| Parameter                  | Value                                                                      |
|----------------------------|----------------------------------------------------------------------------|
| 1 Data File Name           | C:/Users/vatankhah/AppData/Local/Temp/\$kpx3NIVQSG6hJtuik4p+Q/Mehr/312/fid |
| 2 Title                    | Mehr_312.fid                                                               |
| 3 Comment                  | Dr.Shiri- code CN-OH2(vatankhah)-                                          |
| 4 Origin                   | Bruker BioSpin GmbH                                                        |
| 5 Owner                    | root                                                                       |
| 6 Site                     |                                                                            |
| 7 Instrument               | spect                                                                      |
| 8 Author                   |                                                                            |
| 9 Solvent                  | CDCl3                                                                      |
| 10 Temperature             | 296.7                                                                      |
| 11 Pulse Sequence          | zg30                                                                       |
| 12 Experiment              | 1D                                                                         |
| 13 Probe                   | 5 mm PABBO BB-1H/ D Z-GRD Z104275/0252                                     |
| 14 Number of Scans         | 48                                                                         |
| 15 Receiver Gain           | 202.0                                                                      |
| 16 Relaxation Delay        | 1.0000                                                                     |
| 17 Pulse Width             | 15.0000                                                                    |
| 18 Presaturation Frequency |                                                                            |
| 19 Acquisition Time        | 5.4526                                                                     |
| 20 Acquisition Date        | 2021-10-09T14:05:00                                                        |
| 21 Modification Date       | 2024-02-26T05:01:49                                                        |
| 22 Class                   |                                                                            |
| 23 Spectrometer Frequency  | 300.81                                                                     |
| 24 Spectral Width          | 6009.6                                                                     |
| 25 Lowest Frequency        | -1179.7                                                                    |
| 26 Nucleus                 | 1H                                                                         |
| 27 Acquired Size           | 32768                                                                      |
| 28 Spectral Size           | 65536                                                                      |

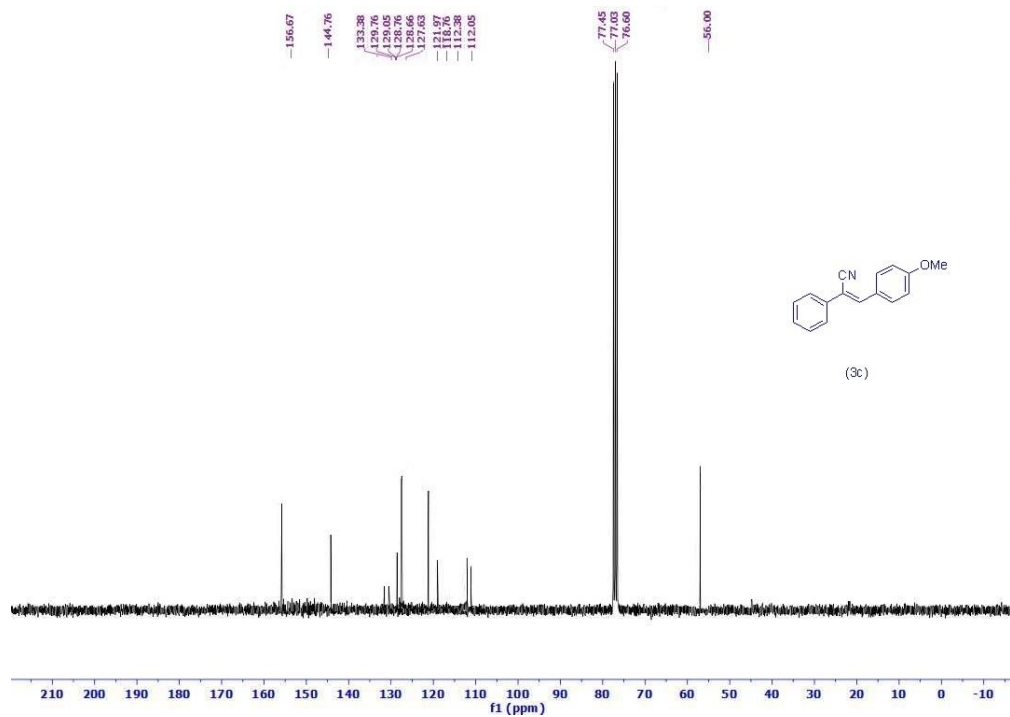

| Parameter                  | Value                                                                          |
|----------------------------|--------------------------------------------------------------------------------|
| 1 Data File Name           | C:/Users/vatankehah/AppData/Local/Temp/ESMz#ZKECbZPzA-#Z6r8A/Shahrivar/115/fid |
| 2 Title                    | Shahrivar.115.fid                                                              |
| 3 Comment                  | vatankehah                                                                     |
| 4 Origin                   | Bruker BioSpin GmbH                                                            |
| 5 Owner                    | root                                                                           |
| 6 Site                     |                                                                                |
| 7 Instrument               | spect                                                                          |
| 8 Author                   |                                                                                |
| 9 Solvent                  | CDCl3                                                                          |
| 10 Temperature             | 297.9                                                                          |
| 11 Pulse Sequence          | zgpg30                                                                         |
| 12 Experiment              | 1D                                                                             |
| 13 Probe                   | 5 mm PABBO BB-1H/D Z-GRD Z104275/0252                                          |
| 14 Number of Scans         | 400                                                                            |
| 15 Receiver Gain           | 202.0                                                                          |
| 16 Relaxation Delay        | 2.0000                                                                         |
| 17 Pulse Width             | 10.0000                                                                        |
| 18 Presaturation Frequency |                                                                                |
| 19 Acquisition Time        | 1.8088                                                                         |
| 20 Acquisition Date        | 2022-08-30T15:29:00                                                            |
| 21 Modification Date       | 2023-05-17T07:30:59                                                            |
| 22 Class                   |                                                                                |
| 23 Spectrometer Frequency  | 75.65                                                                          |
| 24 Spectral Width          | 18115.9                                                                        |
| 25 Lowest Frequency        | -1494.8                                                                        |
| 26 Nucleus                 | 13C                                                                            |
| 27 Acquired Size           | 32768                                                                          |
| 28 Spectral Size           | 65536                                                                          |

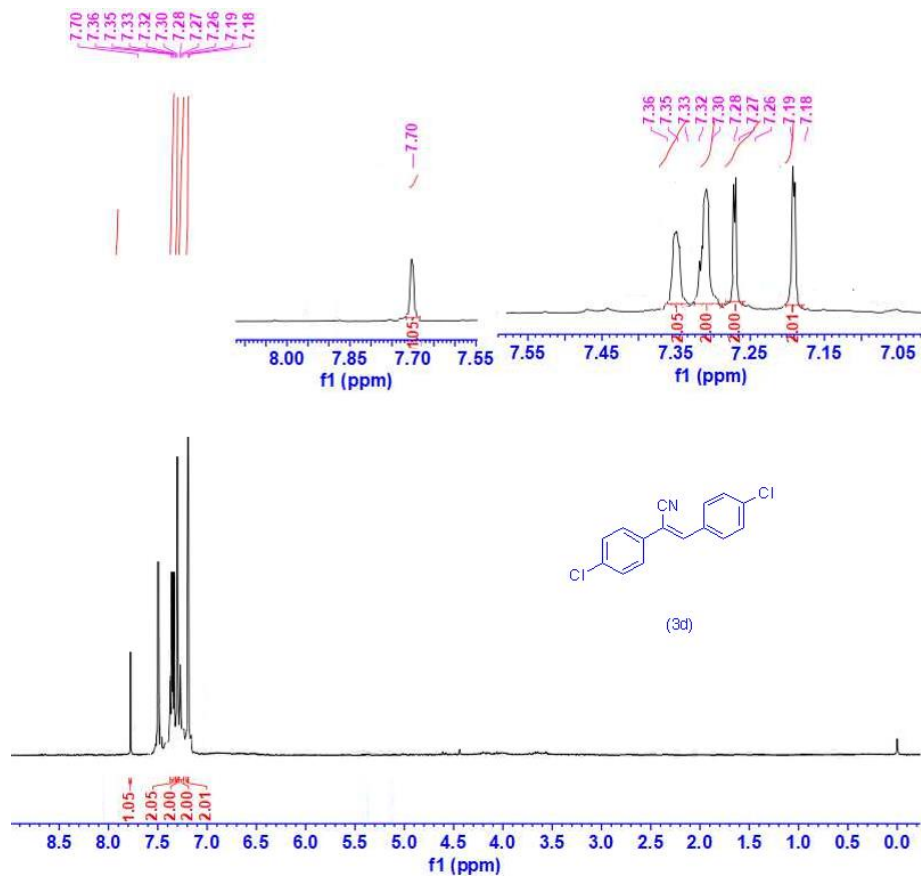

| Parameter                  | Value                                                                   |
|----------------------------|-------------------------------------------------------------------------|
| 1 Data File Name           | C:/Users/vatankhah/AppData/Local/Temp/oCJHkStbSqAzKRFH1zCQ/Mehr/181/fid |
| 2 Title                    | Mehr_181.fid                                                            |
| 3 Comment                  | Dr.Eshghi- code d-d-gh(vatankhah)-                                      |
| 4 Origin                   | Bruker BioSpin GmbH                                                     |
| 5 Owner                    | root                                                                    |
| 6 Site                     |                                                                         |
| 7 Instrument               | spect                                                                   |
| 8 Author                   |                                                                         |
| 9 Solvent                  | CDCl3                                                                   |
| 10 Temperature             | 293.0                                                                   |
| 11 Pulse Sequence          | zg30                                                                    |
| 12 Experiment              | 1D                                                                      |
| 13 Probe                   | 5 mm PABBO BB-1H/ D Z-GRD Z104275/0252                                  |
| 14 Number of Scans         | 64                                                                      |
| 15 Receiver Gain           | 202.0                                                                   |
| 16 Relaxation Delay        | 1.0000                                                                  |
| 17 Pulse Width             | 15.0000                                                                 |
| 18 Presaturation Frequency |                                                                         |
| 19 Acquisition Time        | 5.4526                                                                  |
| 20 Acquisition Date        | 2021-10-03T11:34:00                                                     |
| 21 Modification Date       | 2024-05-24T12:47:13                                                     |
| 22 Class                   |                                                                         |
| 23 Spectrometer Frequency  | 300.81                                                                  |
| 24 Spectral Width          | 6009.6                                                                  |
| 25 Lowest Frequency        | -1179.3                                                                 |
| 26 Nucleus                 | <sup>1</sup> H                                                          |
| 27 Acquired Size           | 32768                                                                   |
| 28 Spectral Size           | 65536                                                                   |

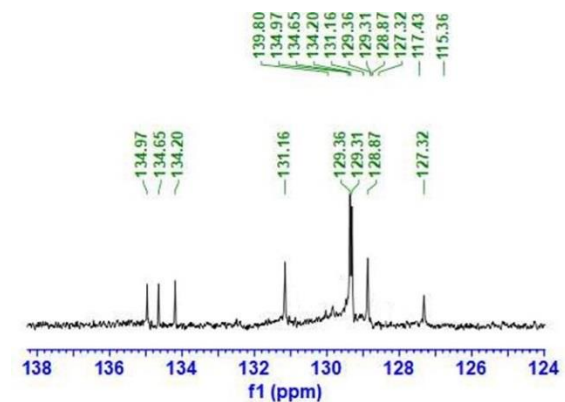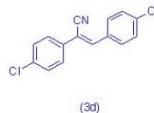

| Parameter                  | Value                                    |
|----------------------------|------------------------------------------|
| 1 Data File Name           | C:/Users/vatankhah/Desktop/Mehr/ 184/ fd |
| 2 Title                    | Mehr. 184. fd                            |
| 3 Comment                  | C13-Dr.Eshghi- code d-d-3(vatankhah)-    |
| 4 Origin                   | Bruker BioSpin GmbH                      |
| 5 Owner                    | root                                     |
| 6 Site                     |                                          |
| 7 Instrument               | spect                                    |
| 8 Author                   |                                          |
| 9 Solvent                  | CDCl3                                    |
| 10 Temperature             | 293.5                                    |
| 11 Pulse Sequence          | zgpg30                                   |
| 12 Experiment              | ID                                       |
| 13 Probe                   | 5 mm PABBO BB-1H/ D Z-GRD Z104275/ 0252  |
| 14 Number of Scans         | 455                                      |
| 15 Receiver Gain           | 202.0                                    |
| 16 Relaxation Delay        | 2.0000                                   |
| 17 Pulse Width             | 10.0000                                  |
| 18 Presaturation Frequency |                                          |
| 19 Acquisition Time        | 1.8088                                   |
| 20 Acquisition Date        | 2021-10-03T12:17:00                      |
| 21 Modification Date       | 2021-10-03T12:17:50                      |
| 22 Class                   |                                          |
| 23 Spectrometer Frequency  | 75.65                                    |
| 24 Spectral Width          | 18115.9                                  |
| 25 Lowest Frequency        | -1494.8                                  |
| 26 Nucleus                 | 13C                                      |
| 27 Acquired Size           | 32768                                    |
| 28 Spectral Size           | 65536                                    |

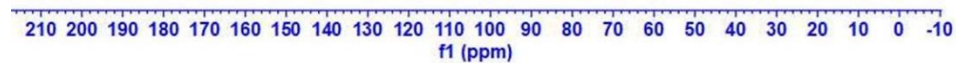

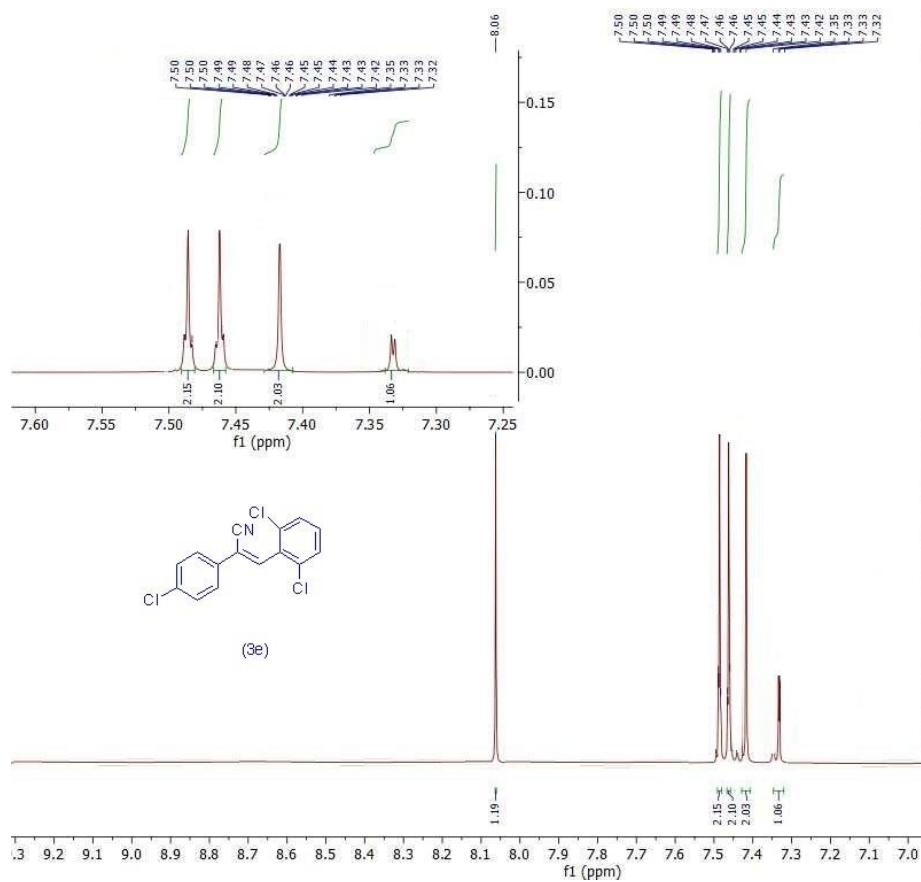

| Parameter                  | Value                                                                       |
|----------------------------|-----------------------------------------------------------------------------|
| 1 Data File Name           | C:/Users/vatankhah/AppData/Local/Temp/oCJHkStk-SquA2kRF-H.1zCQ/Mehr/181/fid |
| 2 Title                    | Mehr.181.fid                                                                |
| 3 Comment                  | Dr.Eshghi- code gh(vatankhah)-                                              |
| 4 Origin                   | Bruker BioSpin GmbH                                                         |
| 5 Owner                    | root                                                                        |
| 6 Site                     |                                                                             |
| 7 Instrument               | spect                                                                       |
| 8 Author                   |                                                                             |
| 9 Solvent                  | CDCl3                                                                       |
| 10 Temperature             | 293.0                                                                       |
| 11 Pulse Sequence          | zg30                                                                        |
| 12 Experiment              | ID                                                                          |
| 13 Probe                   | 5 mm PABBO BB-1H/ D Z-GRD 2104275/0252                                      |
| 14 Number of Scans         | 64                                                                          |
| 15 Receiver Gain           | 202.0                                                                       |
| 16 Relaxation Delay        | 1.0000                                                                      |
| 17 Pulse Width             | 15.0000                                                                     |
| 18 Presaturation Frequency |                                                                             |
| 19 Acquisition Time        | 5.4526                                                                      |
| 20 Acquisition Date        | 2021-10-03T11:34:00                                                         |
| 21 Modification Date       | 2024-05-24T12:47:13                                                         |
| 22 Class                   |                                                                             |
| 23 Spectrometer Frequency  | 300.81                                                                      |
| 24 Spectral Width          | 6009.6                                                                      |
| 25 Lowest Frequency        | -1179.3                                                                     |
| 26 Nucleus                 | <sup>1</sup> H                                                              |
| 27 Acquired Size           | 32768                                                                       |
| 28 Spectral Size           | 65536                                                                       |

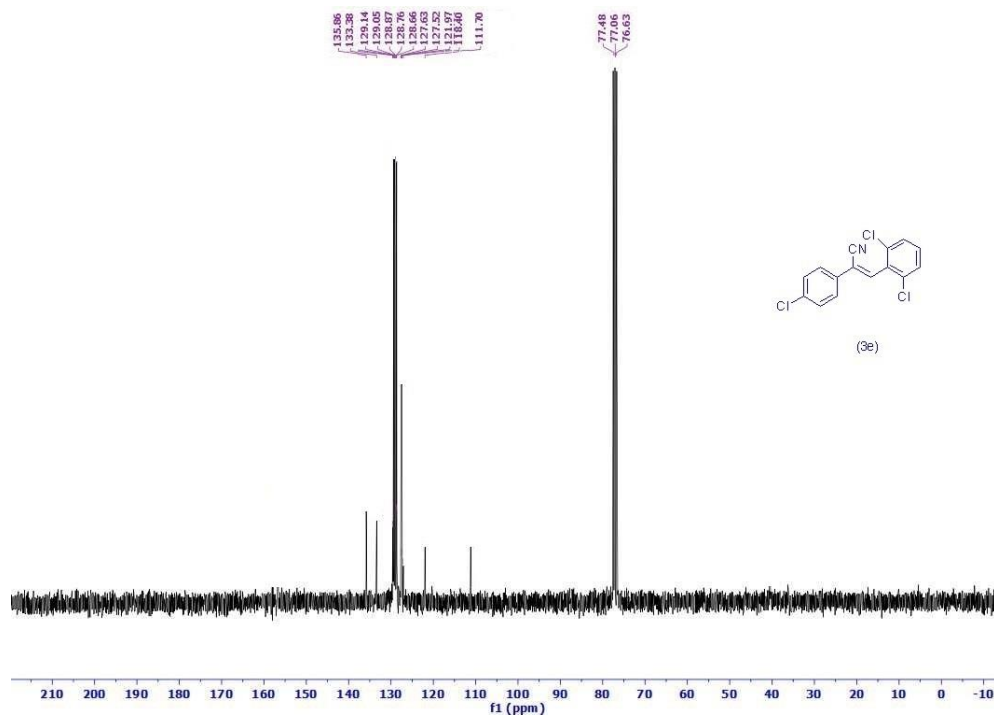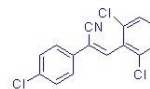

(3e)

| Parameter                  | Value                                                                     |
|----------------------------|---------------------------------------------------------------------------|
| 1 Data File Name           | C:/Users/vatankhah/AppData/Local/Temp/Mhca33uq2c6dkr43g/RfYg/Dey/1005/fid |
| 2 Title                    | Dey_1005.fid                                                              |
| 3 Comment                  | Se-2(vatankhah)-                                                          |
| 4 Origin                   | Bruker BioSpin GmbH                                                       |
| 5 Owner                    | root                                                                      |
| 6 Site                     |                                                                           |
| 7 Instrument               | spect                                                                     |
| 8 Author                   |                                                                           |
| 9 Solvent                  | CDCl3                                                                     |
| 10 Temperature             | 296.7                                                                     |
| 11 Pulse Sequence          | zgpg30                                                                    |
| 12 Experiment              | 1D                                                                        |
| 13 Probe                   | 5 mm PA6BO BB-1H/ D Z-GRD Z104275/ 0252                                   |
| 14 Number of Scans         | 765                                                                       |
| 15 Receiver Gain           | 202.0                                                                     |
| 16 Relaxation Delay        | 2.0000                                                                    |
| 17 Pulse Width             | 10.0000                                                                   |
| 18 Presaturation Frequency |                                                                           |
| 19 Acquisition Time        | 1.8088                                                                    |
| 20 Acquisition Date        | 2022-01-19T12:03:00                                                       |
| 21 Modification Date       | 2023-05-25T10:44:49                                                       |
| 22 Class                   |                                                                           |
| 23 Spectrometer Frequency  | 75.65                                                                     |
| 24 Spectral Width          | 18115.9                                                                   |
| 25 Lowest Frequency        | -1494.8                                                                   |
| 26 Nucleus                 | 13C                                                                       |
| 27 Acquired Size           | 32768                                                                     |

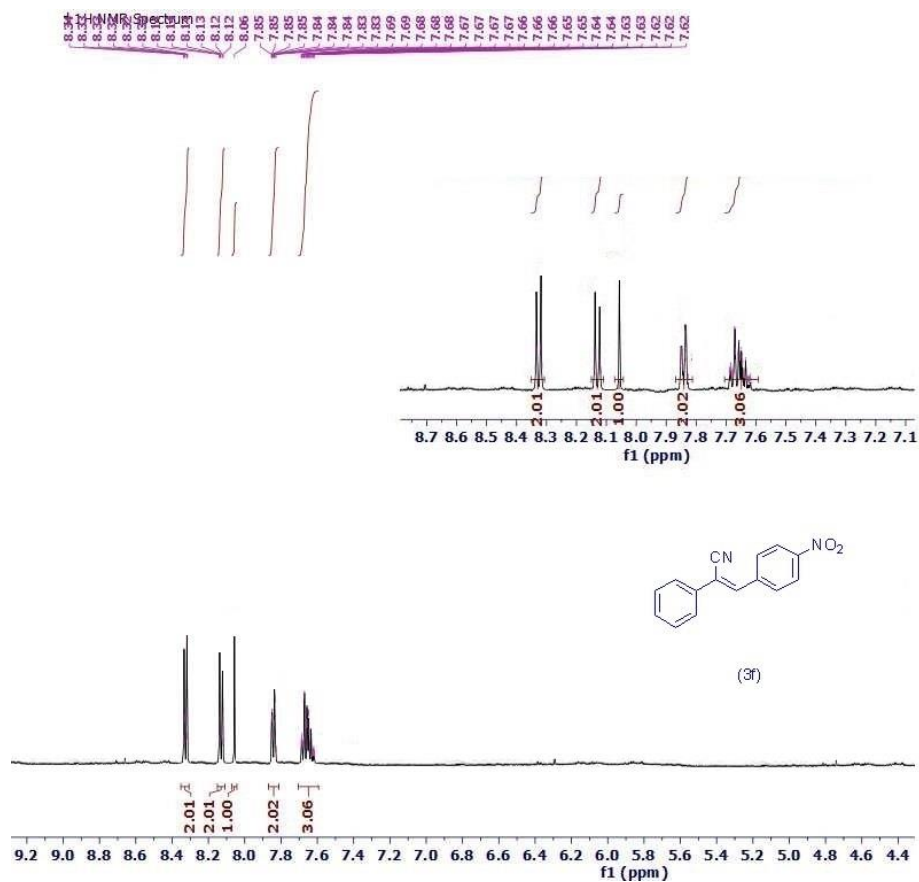

| Parameter                  | Value                                                                  |
|----------------------------|------------------------------------------------------------------------|
| 1 Data File Name           | C:/Users/vatankhah/AppData/Local/Temp/0C3hK8t8SqAzRF+1zCQ/Mehr/181/fid |
| 2 Title                    | Mehr_181.fid                                                           |
| 3 Comment                  | Dr.Eshghi- code (vatankhah)                                            |
| 4 Origin                   | Bruker BioSpin GmbH                                                    |
| 5 Owner                    | root                                                                   |
| 6 Site                     |                                                                        |
| 7 Instrument               | spect                                                                  |
| 8 Author                   |                                                                        |
| 9 Solvent                  | CDCl3                                                                  |
| 10 Temperature             | 293.0                                                                  |
| 11 Pulse Sequence          | zg30                                                                   |
| 12 Experiment              | ID                                                                     |
| 13 Probe                   | 5 mm PABBO BB-1H/ D Z-GRD Z104275/ 0252                                |
| 14 Number of Scans         | 64                                                                     |
| 15 Receiver Gain           | 202.0                                                                  |
| 16 Relaxation Delay        | 1.0000                                                                 |
| 17 Pulse Width             | 15.0000                                                                |
| 18 Presaturation Frequency |                                                                        |
| 19 Acquisition Time        | 5.4526                                                                 |
| 20 Acquisition Date        | 2021-10-03T11:34:00                                                    |
| 21 Modification Date       | 2024-05-24T12:47:13                                                    |
| 22 Class                   |                                                                        |
| 23 Spectrometer Frequency  | 300.81                                                                 |
| 24 Spectral Width          | 6009.6                                                                 |
| 25 Lowest Frequency        | -1179.3                                                                |
| 26 Nucleus                 | 1H                                                                     |
| 27 Acquired Size           | 32768                                                                  |
| 28 Spectral Size           | 65536                                                                  |

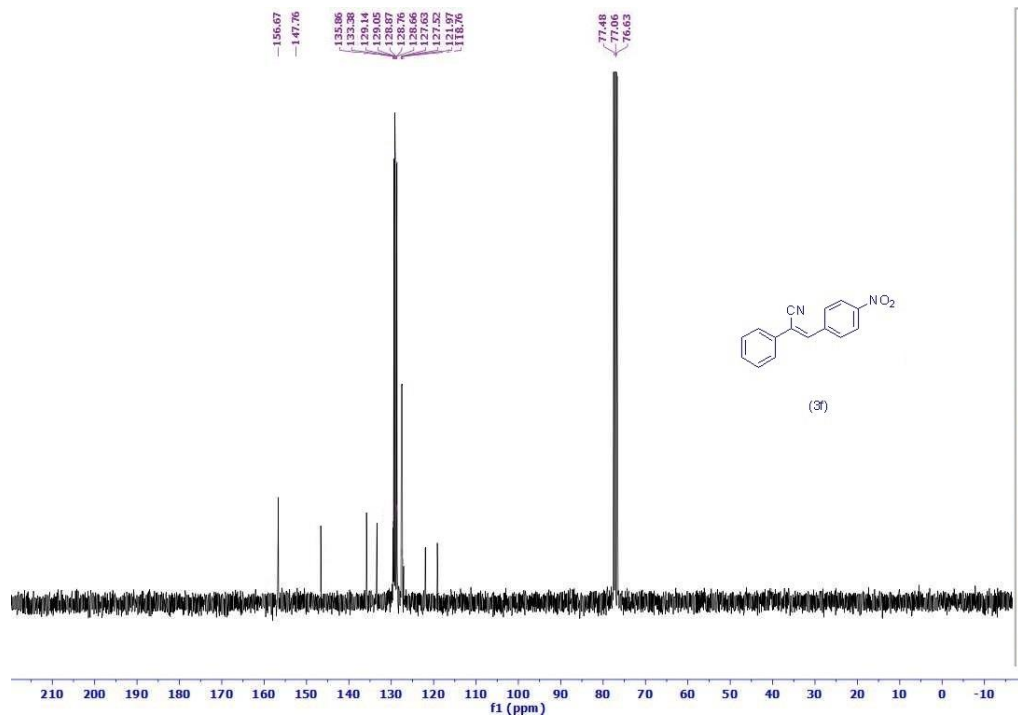

| Parameter                  | Value                                                                     |
|----------------------------|---------------------------------------------------------------------------|
| 1 Data File Name           | C:/Users/vatanhah/AppData/Local/Temp/V53uWyyQT70xgJvgrT6COQ/Mordad/212/fd |
| 2 Title                    | Mordad.212.fid                                                            |
| 3 Comment                  | (vatankhah)                                                               |
| 4 Origin                   | Bruker BioSpin GmbH                                                       |
| 5 Owner                    | root                                                                      |
| 6 Site                     |                                                                           |
| 7 Instrument               | spect                                                                     |
| 8 Author                   |                                                                           |
| 9 Solvent                  | CDCl3                                                                     |
| 10 Temperature             | 296.4                                                                     |
| 11 Pulse Sequence          | zgpg30                                                                    |
| 12 Experiment              | 1D                                                                        |
| 13 Probe                   | 5 mm PABBO BB-1H/ D Z-GRD 2104275/ 0252                                   |
| 14 Number of Scans         | 11500                                                                     |
| 15 Receiver Gain           | 202.0                                                                     |
| 16 Relaxation Delay        | 2.0000                                                                    |
| 17 Pulse Width             | 10.0000                                                                   |
| 18 Presaturation Frequency |                                                                           |
| 19 Acquisition Time        | 1.8088                                                                    |
| 20 Acquisition Date        | 2022-07-31T20:48:00                                                       |
| 21 Modification Date       | 2023-05-25T09:07:34                                                       |
| 22 Class                   |                                                                           |
| 23 Spectrometer Frequency  | 75.65                                                                     |
| 24 Spectral Width          | 18115.9                                                                   |
| 25 Lowest Frequency        | -1494.8                                                                   |
| 26 Nucleus                 | 13C                                                                       |
| 27 Acquired Size           | 32768                                                                     |

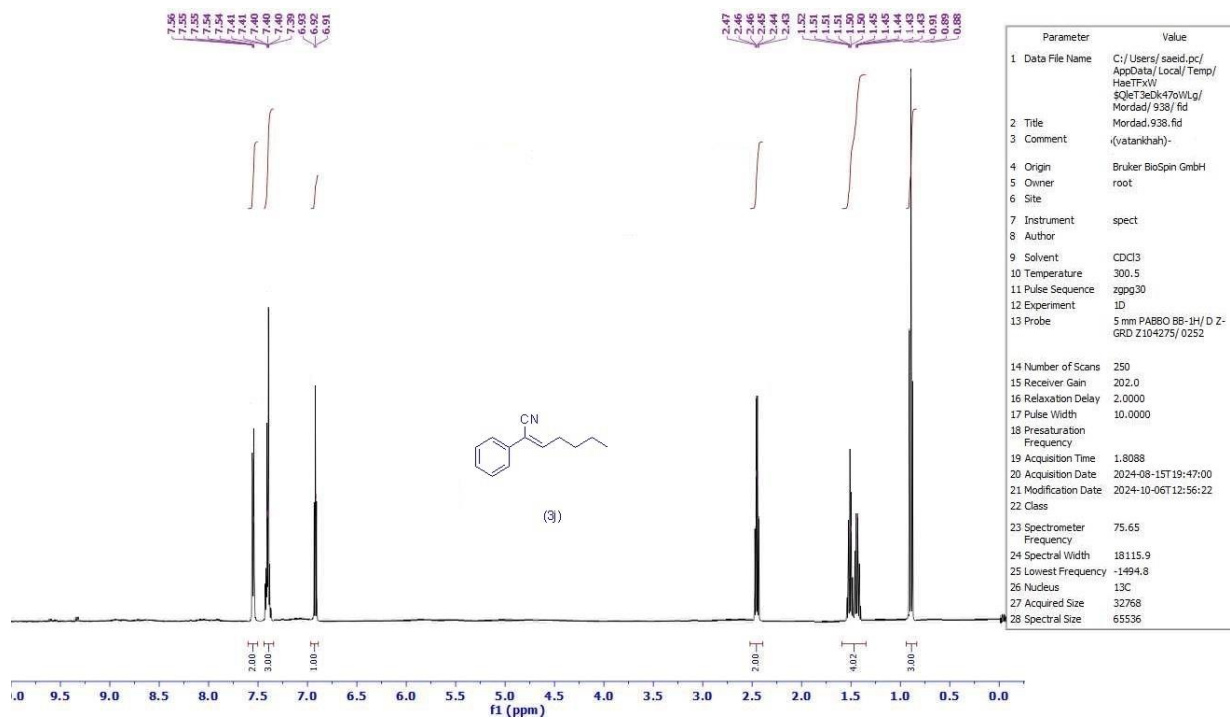

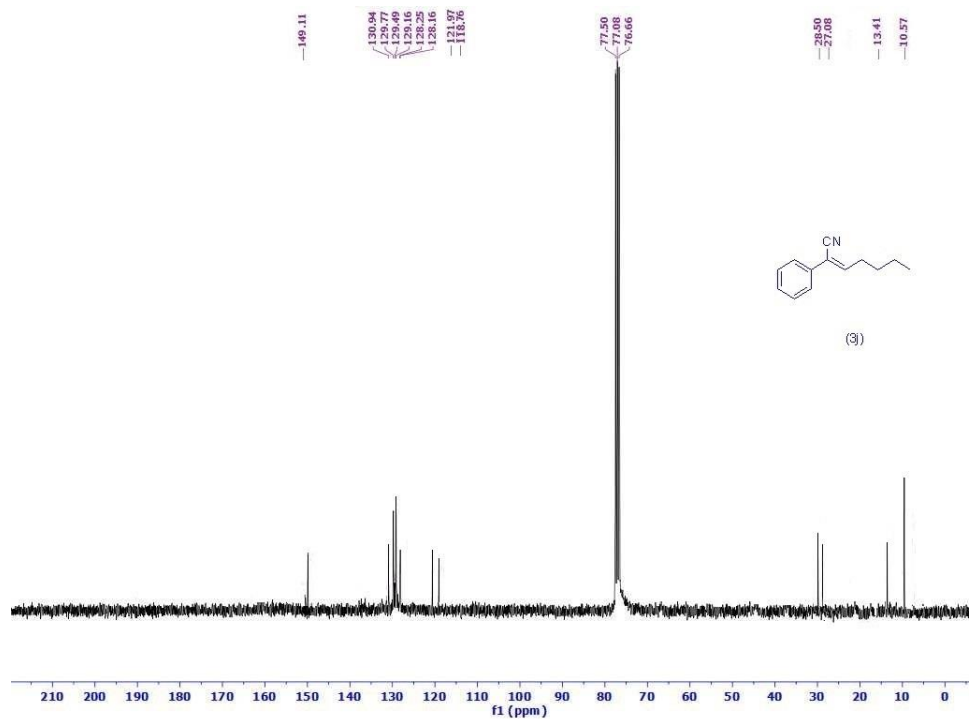

| Parameter                  | Value                                   |
|----------------------------|-----------------------------------------|
| 1 Data File Name           | C:/Users/vatanikh/Desktop/Mehr/184/fid  |
| 2 Title                    | Mehr_184.fid                            |
| 3 Comment                  | Eshghi-code d-d-3(vatanikh)-            |
| 4 Origin                   | Bruker Biospin GmbH                     |
| 5 Owner                    | root                                    |
| 6 Site                     |                                         |
| 7 Instrument               | spect                                   |
| 8 Author                   |                                         |
| 9 Solvent                  | CDCl3                                   |
| 10 Temperature             | 293.5                                   |
| 11 Pulse Sequence          | zgpg30                                  |
| 12 Experiment              | 1D                                      |
| 13 Probe                   | 5 mm PABBO BO-1H/1D Z-GRD Z10-4275/0252 |
| 14 Number of Scans         | 455                                     |
| 15 Receiver Gain           | 202.0                                   |
| 16 Relaxation Delay        | 2.0000                                  |
| 17 Pulse Width             | 10.0000                                 |
| 18 Presaturation Frequency |                                         |
| 19 Acquisition Time        | 1.8088                                  |
| 20 Acquisition Date        | 2021-10-03T12:17:00                     |
| 21 Modification Date       | 2021-10-03T12:17:50                     |
| 22 Class                   |                                         |
| 23 Spectrometer Frequency  | 75.65                                   |
| 24 Spectral Width          | 18115.9                                 |
| 25 Lowest Frequency        | -1464.8                                 |
| 26 Nucleus                 | 13C                                     |
| 27 Acquired Size           | 52768                                   |
| 28 Spectral Size           | 65536                                   |
